# Supplementary material
Source: HighWire-hosted journal article supplement (https://bmjopen.bmj.com/content/14/12/e090555)
Supplement: inline-supplementary-material-1 [file inline-supplementary-material-1.pdf]

**Supplementary Table 1.** International classification of disease (ICD) codes used to define infections and anatomical therapeutic chemical (ATC) classification codes used to define treatment for infections in infants.

| ICD-10 (1997-2021) |                                                                           |                                                               |
|--------------------|---------------------------------------------------------------------------|---------------------------------------------------------------|
| Upper respiratory  | Ear                                                                       | H60.1-H60.3, H65-H67, H70                                     |
|                    | Sinusitis                                                                 | J01                                                           |
|                    | Pharyngitis                                                               | J02, J39.1, J39.2                                             |
|                    | Tonsillitis                                                               | J03                                                           |
|                    | Laryngitis                                                                | J04, J05                                                      |
|                    | Upper respiratory infection, unspecified sites                            | J06                                                           |
|                    | Influenza                                                                 | J09-J11                                                       |
|                    | Peritonsillar abscess                                                     | J36                                                           |
| Lower respiratory  | Viral pneumonia                                                           | J12                                                           |
|                    | Pneumonia                                                                 | J13-J18                                                       |
|                    | Other, including whooping cough                                           | A37, J20-J22, J85, J86                                        |
| Gastrointestinal   | Intestinal infectious diseases                                            | A00-A09                                                       |
|                    |                                                                           | K04.0, K04.4, K04.7, K05.0, K05.2, K11.3, K12.2, K35-K37, K61 |
| Other              | Erysipelas, lymphadenitis, infections of the skin and subcutaneous tissue | A46, H60.0, L00-L08                                           |
|                    | Bacterial infections                                                      | A20-A28, A30-A36, A38-A39, A43-A44, A48-A54, A65-A79, B95-B97 |
|                    | Bacterial sepsis, meningitis and other infections of perinatal period     | A40-A41, G00-G01, G03-G04, G06-G09, P36-P39                   |
|                    | Tuberculosis                                                              | A15-A19                                                       |
|                    | Mycoses                                                                   | A42, B35-B49                                                  |
|                    | Urinary tract                                                             | N13.6, N30.0, N39.0                                           |
|                    | Circulatory system                                                        | I00, I01, I30.1, I33, I40.0, I41.0, I43.0, I52.0              |

|                         |                                                 |                                                                                               |
|-------------------------|-------------------------------------------------|-----------------------------------------------------------------------------------------------|
|                         | Musculoskeletal                                 | M00, M01, M46.2-M46.5M72.6, M86                                                               |
|                         | Tropical                                        | B50-B83, B85-B94                                                                              |
|                         | Encephalitis, rabies, poliomyelitis, meningitis | A80-A89, G02, G05                                                                             |
|                         | Other viral                                     | A60, A63, A90-A96, A98, A99, B00-B02, B04-B06, B08, B09, B15-B19, B25-B27, B30, B33, B34, B97 |
|                         | Congenital viral diseases                       | P35                                                                                           |
| ATC codes               |                                                 |                                                                                               |
| Treatment for infection | Anti-infective for systemic use                 | J01, J02, J04, J05                                                                            |

**Supplementary Table 2.** Number and type of infections and dispensed prescriptions of antibiotics in the first three months of life in 1,248 infants born to women with systemic lupus erythematosus and 34,886 infants born to general population comparators

|                                                                          | Infants born to mothers with SLE, no. cases/total (%) | Infants born to general population comparators, no. cases/total (%) |
|--------------------------------------------------------------------------|-------------------------------------------------------|---------------------------------------------------------------------|
| Primary and Secondary Outpatient infections, National Patient Register   |                                                       |                                                                     |
| Number of infections in the first three days                             |                                                       |                                                                     |
| 0                                                                        | 1,248 (100.0)                                         | 34,881 (100.0)                                                      |
| ≥1                                                                       | 0 (0.0)                                               | 5 (0.0)                                                             |
| Number of infections in the first month                                  |                                                       |                                                                     |
| 0                                                                        | 1,228 (98.4)                                          | 34,057 (97.6)                                                       |
| ≥1                                                                       | 20 (1.6)                                              | 829 (2.4)                                                           |
| Number of infections in the first year of life                           |                                                       |                                                                     |
| 0                                                                        | 900 (72.1)                                            | 25,926 (74.3)                                                       |
| ≥1                                                                       | 348 (27.9)                                            | 8,960 (25.7)                                                        |
| Type of first infection in the first year of life                        |                                                       |                                                                     |
| Upper respiratory                                                        | 174 (13.9)                                            | 4,509 (12.9)                                                        |
| Lower respiratory                                                        | 45 (3.6)                                              | 834 (2.4)                                                           |
| Gastrointestinal                                                         | 25 (2.0)                                              | 786 (2.3)                                                           |
| Other                                                                    | 104 (8.3)                                             | 2831 (8.1)                                                          |
| Primary and Secondary Hospitalized infections, National Patient Register |                                                       |                                                                     |
| Number of infections in the first three days                             |                                                       |                                                                     |
| 0                                                                        | 1,225 (98.2)                                          | 34,550 (99.0)                                                       |
| ≥1                                                                       | 23 (1.8)                                              | 336 (1.0)                                                           |
| Number of infections in the first month                                  |                                                       |                                                                     |
| 0                                                                        | 1,203 (96.4)                                          | 34,190 (98.0)                                                       |
| ≥1                                                                       | 45 (3.6)                                              | 696 (2.0)                                                           |
| Number of infections in the first year of life                           |                                                       |                                                                     |
| 0                                                                        | 1,145 (91.7)                                          | 32,651 (93.6)                                                       |
| ≥1                                                                       | 103 (8.3)                                             | 2,235 (6.4)                                                         |
| Type of first infection in the first year of life                        |                                                       |                                                                     |
| Upper respiratory                                                        | 15 (1.2)                                              | 403 (1.0)                                                           |
| Lower respiratory                                                        | 31 (2.5)                                              | 693 (2.0)                                                           |
| Gastrointestinal                                                         | 7 (0.6)                                               | 286 (0.8)                                                           |
| Other                                                                    | 50 (4.0)                                              | 853 (1.7)                                                           |
| Only Primary Hospitalized Infections, National Patient Register          |                                                       |                                                                     |

|                                                                             |              |               |
|-----------------------------------------------------------------------------|--------------|---------------|
| <b>Number of infections in the first three days</b>                         |              |               |
| 0                                                                           | 1,242 (99.5) | 34,724 (99.5) |
| ≥1                                                                          | 6 (0.5)      | 162 (0.5)     |
| <b>Number of infections in the first month</b>                              |              |               |
| 0                                                                           | 1,226 (98.2) | 34,401 (98.6) |
| ≥1                                                                          | 22 (1.8)     | 485 (1.4)     |
| <b>Number of infections in the first year of life</b>                       |              |               |
| 0                                                                           | 1,176 (94.2) | 32,998 (94.6) |
| ≥1                                                                          | 72 (5.8)     | 1,888 (5.4)   |
| <b>Type of first infection in the first year of life</b>                    |              |               |
| Upper respiratory                                                           | 12 (1.0)     | 342 (1.0)     |
| Lower respiratory                                                           | 31 (2.5)     | 686 (2.0)     |
| Gastrointestinal                                                            | 6 (0.5)      | 267 (0.8)     |
| Other                                                                       | 23 (1.8)     | 593 (1.7)     |
| <b>Dispensed prescriptions of anti-infectives, Prescribed Drug Register</b> |              |               |
| <b>Number of dispensations in the first three days</b>                      |              |               |
| 0                                                                           | 1,245 (99.8) | 34,803 (99.8) |
| ≥1                                                                          | 3 (0.2)      | 83 (0.2)      |
| <b>Number of dispensations in the first month</b>                           |              |               |
| 0                                                                           | 1,232 (98.7) | 34,447 (98.7) |
| ≥1                                                                          | 16 (1.3)     | 439 (1.3)     |
| <b>Number of dispensations in the first year of life</b>                    |              |               |
| 0                                                                           | 1,015 (81.3) | 27,868 (79.9) |
| ≥1                                                                          | 233 (18.7)   | 7,018 (20.1)  |

**Supplementary Table 3.** Sensitivity analysis restricted to first births only. Risk ratios for any infection in the first three days and in the first year of life comparing 559 infants born to mothers with SLE to 14,283 infants born to mothers from the general population, overall and by preterm birth

|                                          | Infants born to mothers with SLE, no. cases/total (%) | Infants born to general population comparators, no. cases/total (%) | Unadjusted Risk Ratio (95% CI) | Adjusted Risk Ratio (95% CI)* |
|------------------------------------------|-------------------------------------------------------|---------------------------------------------------------------------|--------------------------------|-------------------------------|
| Any infection in the first three days    |                                                       |                                                                     |                                |                               |
| Overall                                  | 18/559 (3.2)                                          | 211/14,283 (1.5)                                                    | 2.18 (1.36-3.50)               | 2.04 (1.26-3.30)              |
| Term birth                               | 8/475 (1.7)                                           | 161/13,474 (1.2)                                                    | 1.41 (0.70-2.85)               | 1.27 (0.62-2.60)              |
| Preterm birth (32 to 37 weeks)           | 0/61 (0.0)                                            | 16/683 (2.3)                                                        | NE                             | NE                            |
| Very preterm birth (<32 weeks)           | 10/23 (43.5)                                          | 34/126 (27.0)                                                       | 1.61 (0.93-2.79)               | 1.68 (0.97-2.93)              |
| Any infection in the first month of life |                                                       |                                                                     |                                |                               |
| Overall                                  | 26/559 (4.6)                                          | 541/14,283 (3.8)                                                    | 1.23 (0.84-1.80)               | 1.17 (0.80-1.73)              |
| Term birth                               | 15/475 (3.2)                                          | 475/13,474 (3.5)                                                    | 0.90 (0.54-1.49)               | 0.85 (0.51-1.42)              |
| Preterm birth (32 to 37 weeks)           | 1/61 (1.6)                                            | 30/683 (4.4)                                                        | 0.37 (0.05-2.69)               | 0.36 (0.05-2.57)              |
| Very preterm birth (<32 weeks)           | 10/23 (43.5)                                          | 36/126 (28.6)                                                       | 1.52 (0.89-2.62)               | 1.58 (0.91-2.73)              |
| Any infection in the first year of life  |                                                       |                                                                     |                                |                               |

|                                                   |                |                     |                  |                  |
|---------------------------------------------------|----------------|---------------------|------------------|------------------|
| Overall                                           | 173/559 (31.0) | 4,460/12,283 (31.2) | 0.99 (0.87-1.12) | 1.06 (0.93-1.20) |
| Term birth                                        | 138/475 (29.1) | 4,165/13,474 (30.9) | 0.93 (0.81-1.08) | 1.01 (0.88-1.17) |
| Preterm birth (32 to 37 weeks)                    | 19/61 (31.2)   | 226/683 (33.1)      | 0.94 (0.64-1.39) | 0.96 (0.65-1.41) |
| Very preterm birth (<32 weeks)                    | 16/23 (69.6)   | 69/126 (54.8)       | 1.27 (0.93-1.74) | 1.31 (0.95-1.80) |
| Hospitalized infection in the first three days    |                |                     |                  |                  |
| Overall                                           | 5/559 (0.9)    | 89/14,283 (0.6)     | 1.44 (0.59-3.52) | 1.36 (0.55-3.37) |
| Term birth                                        | 5/475 (1.1)    | 87/13,474 (0.7)     | 1.63 (0.67-4.00) | 1.54 (0.62-3.84) |
| Preterm birth (32 to 37 weeks)                    | 0/61 (0.0)     | 2/683 (0.3)         | NE               | NE               |
| Very preterm birth (<32 weeks)                    | 0/23 (0.0)     | 0/126 (0.0)         | NE               | NE               |
| Hospitalized infection in the first month of life |                |                     |                  |                  |
| Overall                                           | 8/559 (1.4)    | 150/14,283 (1.1)    | 1.36 (0.67-2.76) | 1.28 (0.62-2.62) |
| Term birth                                        | 8/475 (1.7)    | 146/13,474 (1.1)    | 1.55 (0.77-3.15) | 1.44 (0.70-2.96) |
| Preterm birth (32 to 37 weeks)                    | 0/61 (0.0)     | 4/683 (0.6)         | NE               | NE               |
| Very preterm birth (<32 weeks)                    | 0/23 (0.0)     | 0/126 (0.0)         | NE               | NE               |
| Hospitalized infection in first year of life      |                |                     |                  |                  |
| Overall                                           | 25/559 (4.5)   | 560/14,283 (3.9)    | 1.14 (0.77-1.69) | 1.22 (0.82-1.81) |

|                                |              |                  |                   |                   |
|--------------------------------|--------------|------------------|-------------------|-------------------|
| Term birth                     | 21/475 (4.4) | 509/13,474 (3.8) | 1.17 (0.76, 1.79) | 1.27 (0.83, 1.96) |
| Preterm birth (32 to 37 weeks) | 2/61 (3.3)   | 38/683 (5.6)     | 0.59 (0.15-2.38)  | 0.60 (0.15-2.45)  |
| Very preterm birth (<32 weeks) | 2/23 (8.7)   | 13/126 (10.3)    | 0.84 (0.20-3.49)  | 0.98 (0.22-4.44)  |

Abbreviation: NE = not possible due to low number of events. Any infection is based on primary and secondary ICD-coded visits in the in- and outpatient databases of the National Patient Register and prescribed anti-infectives in the Prescribed Drug Register.  
\*Models are adjusted for maternal age at delivery (continuous), maternal first-trimester smoking (yes/no/missing), and calendar year (continuous).

**Supplementary Table 4.** Sensitivity analyses restricted to A) first births only and B) mothers without an infection during pregnancy. Estimates of direct effects and effects mediated through preterm birth (<37 weeks gestation) of the association between maternal SLE and infections in infants in the first three days and in the first year of life\*

| Mediator: Preterm birth (<37 weeks)<br>vs. full term | Direct effect     | Indirect effect<br>through preterm birth | Total effect      | Mediated<br>through preterm<br>birth, % (95%<br>CI) |
|------------------------------------------------------|-------------------|------------------------------------------|-------------------|-----------------------------------------------------|
| A) First births only                                 |                   |                                          |                   |                                                     |
| Any infection in the first 3 days of life            | 1.48 (0.68-2.28)  | 1.47 (1.06-1.87)                         | 2.17 (1.05-3.29)  | 59 (19-98)                                          |
| Any infection in the first year of life              | 1.02 (0.83-1.22)  | 1.06 (0.99-1.13)                         | 1.08 (0.88-1.29)  | 77 (117 – 272)                                      |
| B) Mothers without infection<br>during pregnancy     |                   |                                          |                   |                                                     |
| Any infection in the first 3 days of life            | 1.16 (0.62, 1.70) | 1.61 (1.20, 2.02)                        | 1.87 (1.07, 2.67) | 82 (33-130)                                         |
| Any infection in the first year of life              | 1.07 (0.94, 1.21) | 1.05 (1.00, 1.10)                        | 1.13 (0.99, 1.27) | 45 (8-98)                                           |

\* Values are odd ratios (95% confidence interval) which estimates risk ratios unless indicated otherwise. Models are adjusted for maternal age at delivery (continuous), maternal first-trimester smoking (yes/no/missing), and calendar year (continuous).
